# Correction: Cryo-EM in drug discovery

Tom Ceska, Chun-Wa Chung, Rob Cooke, Chris Phillips and Pamela A. Williams

*Biochem. Soc. Trans.* (2019) 47(1) 281–293; <https://doi.org/10.1042/BST20180267>

It has come to the attention of the authors that reference 34 in their ahead of print article cites the incorrect article. This has been corrected in the version published in volume 47 issue 1. The correct citation for reference 34 should be:

- 34 Scapin, G., Dandey, V.P., Zhang, Z., Prosis, W., Hruza, A., Kelly, T. et al. (2018) Structure of the insulin receptor–insulin complex by single-particle cryo-EM analysis. *Nature* **556**, 122–125 <https://doi.org/10.1038/nature26153>

Correction published:  
28 February 2019
